# Supplementary material
Source: PubMed Central journal article supplement (PMC7415677)
Supplement: NIHMS1603743-supplement-8.pdf [file NIHMS1603743-supplement-8.pdf]

**Table S1 (related to Figure 1D):** List of cell surface markers highly expressed in Type III cell population (top 20).

|    | Gene Symbol      | Description                                                                          | Signal to Noise<br>(Type III to rest) |
|----|------------------|--------------------------------------------------------------------------------------|---------------------------------------|
| 1  | <i>Cd63</i>      | CD63 antigen                                                                         | 0.3695                                |
| 2  | <i>Cd81</i>      | CD81 antigen                                                                         | 0.3528                                |
| 3  | <i>Ncam1</i>     | neural cell adhesion molecule 1                                                      | 0.3494                                |
| 4  | <i>Tnfrsf12a</i> | tumor necrosis factor receptor superfamily, member 12a                               | 0.3245                                |
| 5  | <i>Psmb6</i>     | proteasome (prosome, macropain) subunit, beta type 6                                 | 0.3115                                |
| 6  | <i>Itga5</i>     | integrin alpha 5 (fibronectin receptor alpha)                                        | 0.28                                  |
| 7  | <i>Ifitm1</i>    | interferon induced transmembrane protein 1                                           | 0.2591                                |
| 8  | <i>Lamp2</i>     | lysosomal-associated membrane protein 2                                              | 0.2534                                |
| 9  | <i>Bst2</i>      | bone marrow stromal cell antigen 2                                                   | 0.2195                                |
| 10 | <i>Rae1</i>      | ribonucleic acid export 1                                                            | 0.217                                 |
| 11 | <i>Icosl</i>     | icos ligand                                                                          | 0.2119                                |
| 12 | <i>Il15ra</i>    | interleukin 15 receptor, alpha chain                                                 | 0.1931                                |
| 13 | <i>Gstm7</i>     | glutathione S-transferase, mu 7                                                      | 0.1925                                |
| 14 | <i>Tnfsf8</i>    | tumor necrosis factor (ligand) superfamily, member 8                                 | 0.1925                                |
| 15 | <i>Cxcr6</i>     | chemokine (C-X-C motif) receptor 6                                                   | 0.1925                                |
| 16 | <i>Mfi2</i>      | antigen p97 (melanoma associated) identified by monoclonal antibodies 133.2 and 96.5 | 0.1859                                |
| 17 | <i>Krt20</i>     | keratin 20                                                                           | 0.183                                 |
| 18 | <i>Abcg2</i>     | ATP-binding cassette, sub-family G (WHITE), member 2                                 | 0.1781                                |
| 19 | <i>Pdgfra</i>    | platelet derived growth factor receptor, alpha polypeptide                           | 0.1742                                |
| 20 | <i>Cd59a</i>     | CD59a antigen                                                                        | 0.1719                                |

**Table S2 (related to Table 1):** Baseline characteristics of study participants (n=28).

| Characteristic                       | Value           |
|--------------------------------------|-----------------|
| Age (years)                          | 50 ± 11         |
| Men                                  | 48 ± 12         |
| Women                                | 52 ± 10         |
| Gender, n (%)                        |                 |
| Men                                  | 12 (43%)        |
| Women                                | 16 (57%)        |
| Body mass index (kg/m <sup>2</sup> ) | 36 ± 10         |
| Fat mass (kg)                        | 41 ± 13         |
| Percentage body fat (%)              | 39 ± 7          |
| Lean mass (kg)                       | 55 ± 15         |
| VAT mass (kg)                        | 0.79 ± 0.39     |
| %VAT/FM                              | 2.1 (1.2 - 2.8) |
| Diabetes, n (%)                      | 11 (39%)        |
| Fasting glucose (mg/dL) <sup>a</sup> | 129 ± 43        |
| Fasting Insulin (mIU/L) <sup>a</sup> | 27 ± 115        |
| HOMA-IR <sup>a</sup>                 | 10 ± 8          |
| Triglycerides (mg/dL)                | 183 ± 226       |
| Total cholesterol (mg/dL)            | 192 ± 52        |
| LDL cholesterol (mg/dL)              | 105 ± 37        |
| HDL cholesterol (mg/dL)              | 51 ± 14         |
| DBP (mmHg)                           | 84 ± 12         |
| SBP (mmHg)                           | 131 ± 11        |

Data are presented as mean ± SD or median (IQR).

<sup>a</sup> Insulin-treated patient (n = 1) was excluded from the analysis.

VAT: visceral adipose tissue; FM: fat mass; DBP: diastolic blood pressure; SBP: systolic blood pressure. HOMA-IR = Fasting insulin (mIU/L) x [fasting blood glucose (mg/dL)/405].

**Table S3 (related to STAR methods):** Primer sequences used for quantitative RT-PCR.

| Gene                  | Forward                     | Reverse                    |
|-----------------------|-----------------------------|----------------------------|
| <i>Acta2</i>          | GTCCCAGACATCAGGGAGTAA       | TCGGATACTTCAGCGTCAGGA      |
| <i>Adipoq</i>         | GCACTGGCAAGTTCTACTGCAA      | GTAGGTGAAGAGAACGGCCTTGT    |
| <i>Adrb1</i>          | CCGAAAGCAGGTGAATGCAA        | AGCCAGTAAGCCATACTAAGCCACA  |
| <i>Adrb2</i>          | CATTGATGTGTTGTGCGTCA        | ACTCGGGCCTTATTCTTGGT       |
| <i>Adrb3</i>          | CCTCCGTCGTCTTCTGTGT         | AGCCATCAAACCTGTTGAGC       |
| <i>Cd11c (Itgax)</i>  | AAAATCTCCAACCCATGCTG        | CACCACCAGGGTCTTCAAGT       |
| <i>Cd36</i>           | TGCATTTGCCAATGTCTAGC        | CCCTCCAGAATCCAGACAAC       |
| <i>Cd81</i>           | TCTACGTGGGCATCTACATTCT      | ATCCTTGGCGATCTGGTCTTT      |
| <i>Cd206 (Mrc1)</i>   | CAAGGAAGGTTGGCATTGT         | CCTTTCAGTCCTTTCGAAGC       |
| <i>Cidea</i>          | ATCACAACCTGGCTGGTTACG       | TACTACCCGGTGTCCATTCT       |
| <i>Col1a1</i>         | GCTCCTCTTAGGGGCCACT         | CCACGTCTCACCATTGGGG        |
| <i>Col3a1</i>         | CTGTAACATGGAACTGGGGAAA      | CCATAGCTGAACTGAAAACCACC    |
| <i>Col6a1</i>         | CTGCTGCTACAAGCCTGCT         | CCCCATAAGGTTTCAGCCTCA      |
| <i>Col6a3</i>         | GCTGCGGAATCACTTTGTGC        | CACCTTGACACCTTTCTGGGT      |
| <i>Cox7a</i>          | CAGCGTCATGGTCAGTCTGT        | AGAAAACCGTGTGGCAGAGA       |
| <i>Cox8b</i>          | GAACCATGAAGCCAACGACT        | GCGAAGTTCACAGTGGTTCC       |
| <i>Dio2</i>           | CAGTGTGGTGCACGTCTCCAATC     | TGAACCAAAGTTGACCACCAG      |
| <i>Elovl3</i>         | TCCGCGTTCTCATGTAGGTCT       | GGACCTGATGCAACCCTATGA      |
| <i>F4/80 (Adgre1)</i> | TTTCCTCGCTGCTTCTTC          | CCCCGTCTCTGTATTCAACC       |
| <i>Ilf6</i>           | CTGATGCTGGTGACAACCAC        | TTTTCTGCAAGTGCATCATCGT     |
| <i>Itgb2</i>          | AGGAGCATCGCTAATCCTGAG       | CCTGGTCGCAAGTAAAGTGTC      |
| <i>Kcnk3</i>          | ACGGAGGCAAGGTGTTCTG         | ACGACACGAAACCGATGAGC       |
| <i>Loxl2</i>          | ATTAACCCCAACTATGAAGTGCC     | CTGTCTCCTCACTGAAGGCTC      |
| <i>Mcp1 (Ccl2)</i>    | ATGCAGGTCCCTGTCATGCTT       | GGCATCACAGTCCGAGTCACAC     |
| <i>Myh11</i>          | GAGCAAACCTCAGGAGAGGAAAC     | GTCCCGAGCGTCCATTTCTTC      |
| <i>Myl9</i>           | ACAGCGCCGAGGACTTTTC         | AGACATTGGACGTAGCCCTCT      |
| <i>Pgc1a</i>          | AGCCGTGACCACTGACAACGAG      | GCTGCATGGTTCTGAGTGCTAAG    |
| <i>Pparg</i>          | GCATGGTGCCTTCGCTGA          | TGGCATCTCTGTGTCAACCATG     |
| <i>Prdm16</i>         | GGCGAGGAAGCTAGCCAAA         | GGTCTCCTCCTCGGCACTCT       |
| <i>Sm22</i>           | CAACAAGGGTCCATCCTACGG       | ATCTGGGCGGCCTACATCA        |
| <i>Tgfb1</i>          | CTCCCGTGGCTTCTAGTGC         | GCCTTAGTTTGACAGGATCTG      |
| <i>Tnfa</i>           | ACACTCAGATCATCTTCTCAAAATTCG | GTGTGGGTGAGGAGCACGTAGT     |
| <i>Ucp1</i>           | CACCTTCCCGCTGGACACT         | CCCTAGGACACCTTTATACCTAATGG |
| <i>Tbp</i>            | ACCCTTCACCAATGACTCCTATG     | TGACTGCAGCAAATCGCTTGG      |
| <i>36B4</i>           | TCCAGGCTTTGGGCATCA          | CTTTATCAGCTGCACATCACTCAGA  |
| <i>Hprt</i>           | TCAGTCAACGGGGGACATAAA       | GGGGCTGTACTGCTTAACCAG      |
